# Supplementary material for: Integrated bioinformatics data analysis reveals a risk signature and PKD1 induced progression in endometrial cancer patients with postmenopausal status
Source: publisher site journal article supplement (doi:10.18632/aging.204168), 2022-07-09
Supplement: Supplementary file [file aging-v14i13-204168-supplementary-material-SD1.pdf]

**SUPPLEMENTARY FIGURES**

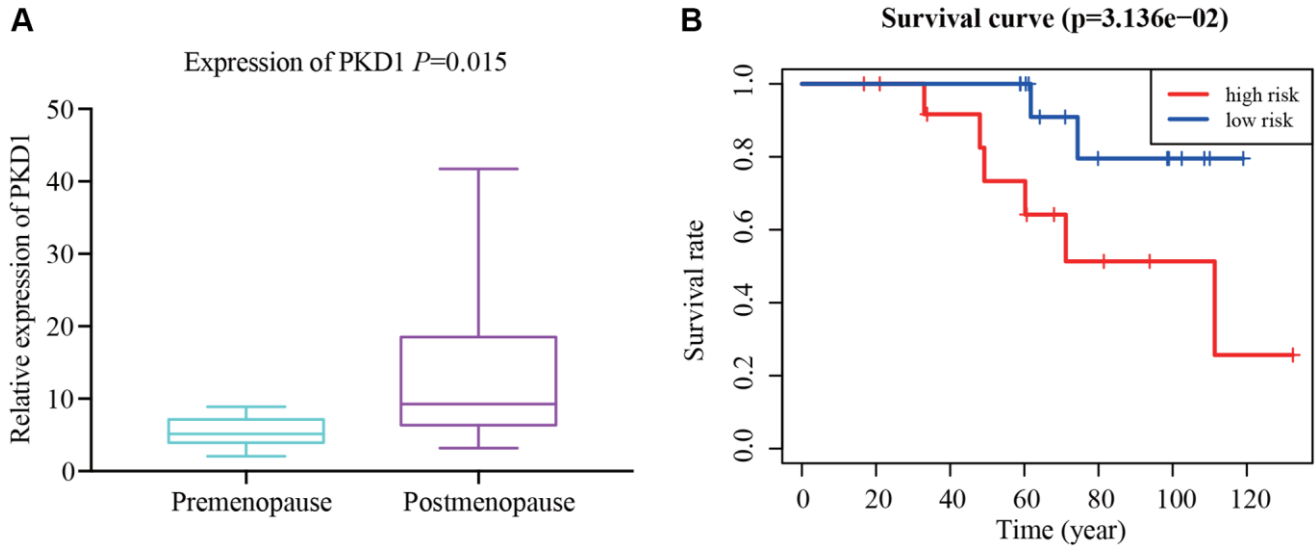

**Supplementary Figure 1. Validation of the risk model. (A)** Expression of PKD1 **(B)** Survival curve of patients in our center.

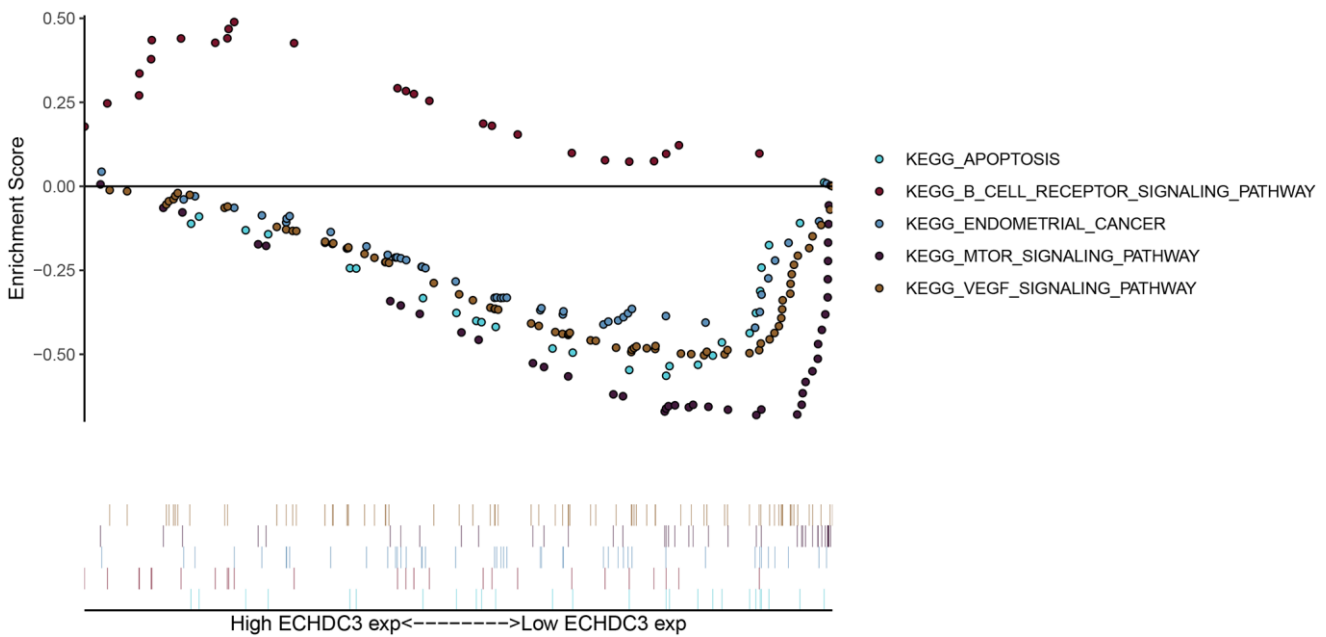

**Supplementary Figure 2. KEGG analysis of gene set enrichment analysis (GSEA) in high- and low- expression of PKD1 groups.**

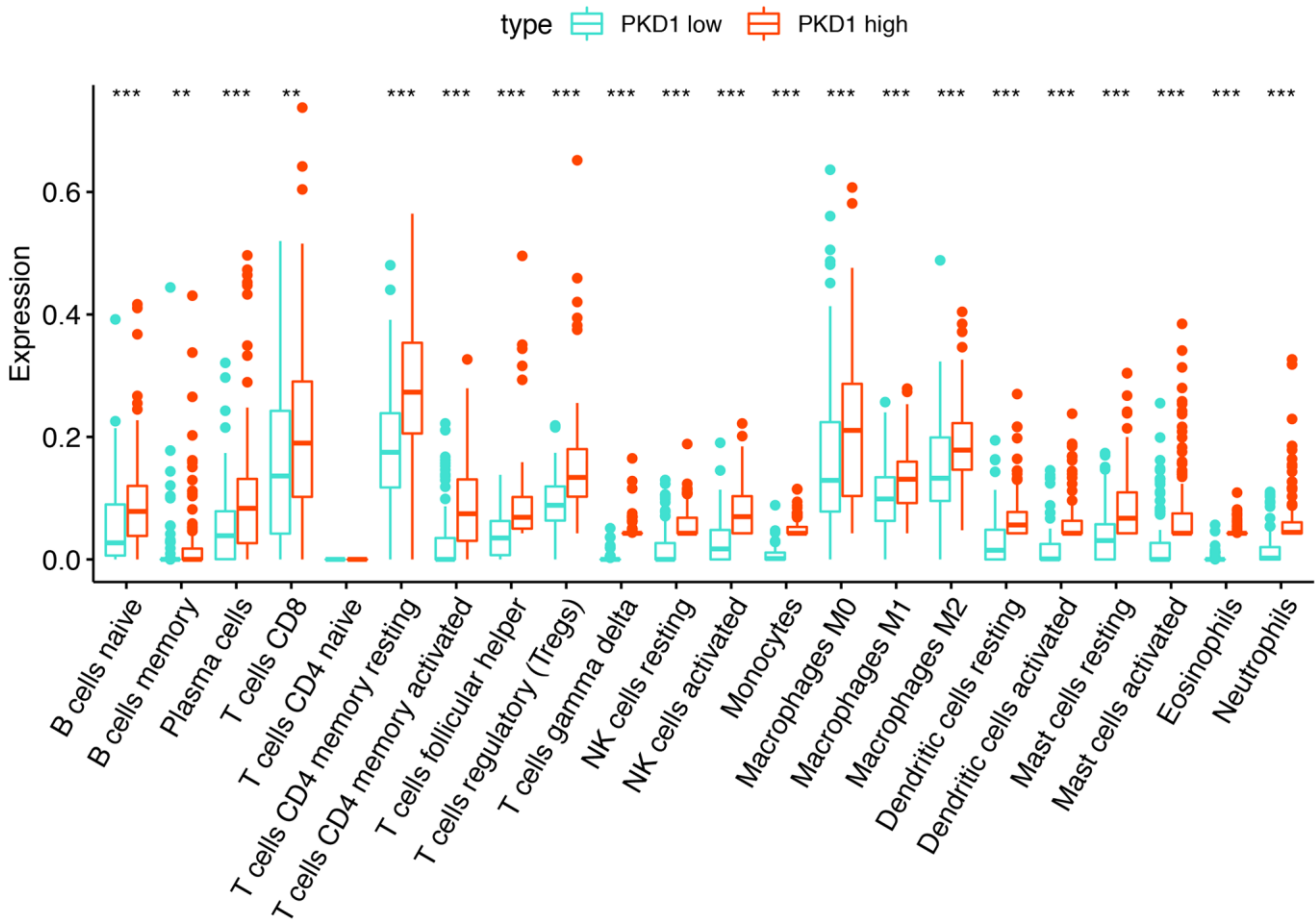

Supplementary Figure 3. Analysis of 22 immune cell in low- and high-expression of PKD1 groups.
